# Supplementary material for: Assemblies of covalently cross-linked nanosheets of MoS2and of MoS2–RGO: synthesis and novel properties
Source: Royal Society of Chemistry journal article supplement (doi:10.1039/c6ta00645k), 2016-01-01
Supplement: c6ta00645k1.pdf [file c6ta00645k1.pdf]

## Electronic Supplementary Information

### Assemblies of Covalently Cross-linked Nanosheets of MoS<sub>2</sub> and of MoS<sub>2</sub>-RGO: Synthesis and Novel Properties

K. Pramoda, Uttam Gupta, Irshad Ahmad, Ram kumar and C.N.R. Rao\*<sup>[a]</sup>

---

<sup>a</sup> *New Chemistry Unit, Chemistry and Physics Materials Unit  
CSIR center of excellence in chemistry, Sheikh Saqr Laboratory, Jawaharlal Nehru Centre for  
Advanced Scientific Research, Jakkur P. O., Bangalore 560064 (India).*

\* *E-mail: cnrrao@jncasr.ac.in*

#### Experimental section:

**Reagents and precursors:** Chemicals used in synthesis were of high purity and obtained from commercial sources. Solvents were pre dried before synthesis. 4,4'-diethynylbiphenyl (DEBP) was synthesized using previously reported procedure.<sup>1</sup>

#### Hydrogen evolution measurements:

MoS<sub>2</sub> and MoS<sub>2</sub>-RGO assemblies were dispersed in a solution of water and triethanolamine (TEAO) (15% v/v) by sonication, to this 14 μmol of Eosin Y dye was added. The vessel was purged with N<sub>2</sub>, and illuminated by 100 W halogen lamp under constant stirring. The evolved gases were manually collected from the headspace and analyzed in thermal conductivity detector (TCD) in a gas chromatograph (PerkinElmer Clarus ARNEL 580GC).

The turn over frequency (TOF) is calculated with respect to catalyst from formula,

$$TOF (/h) = \frac{\text{moles of Hydrogen evolved per hour (activity of the catalyst)}}{\text{moles of the catalyst used}}$$

**Instrumentation:**

Infrared (IR) spectra were recorded using Bruker ATR-FTIR spectrometer. Morphological analysis has been performed using Nova Nano SEM 600, FEI Company. Transmission Electron Microscopy (TEM) has been carried out with FEI TITAN3TM with an accelerating voltage of 80 kV. Thermo gravimetric analysis (TGA) was done in nitrogen atmosphere in the range of 30-900 °C at a heating rate of 3 °C/ min using Mettler Toledo TGA 850 instrument. XP spectra were recorded in an Omicron Nanotechnology Spectrometer with Mg K- $\alpha$  as the X-ray source. PXRD pattern of MoS<sub>2</sub> and MoS<sub>2</sub>-RGO assemblies were recorded in PANalytical Empyrean using Cu K- $\alpha$  radiation.

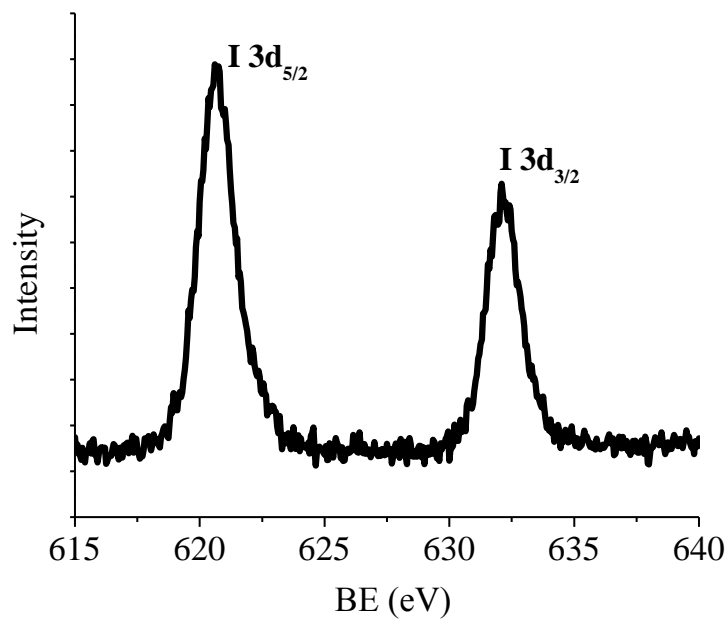

**Fig. S1** High resolution Iodine (3d) X-ray photoelectron spectrum of Iodobenzene functionalized RGO.

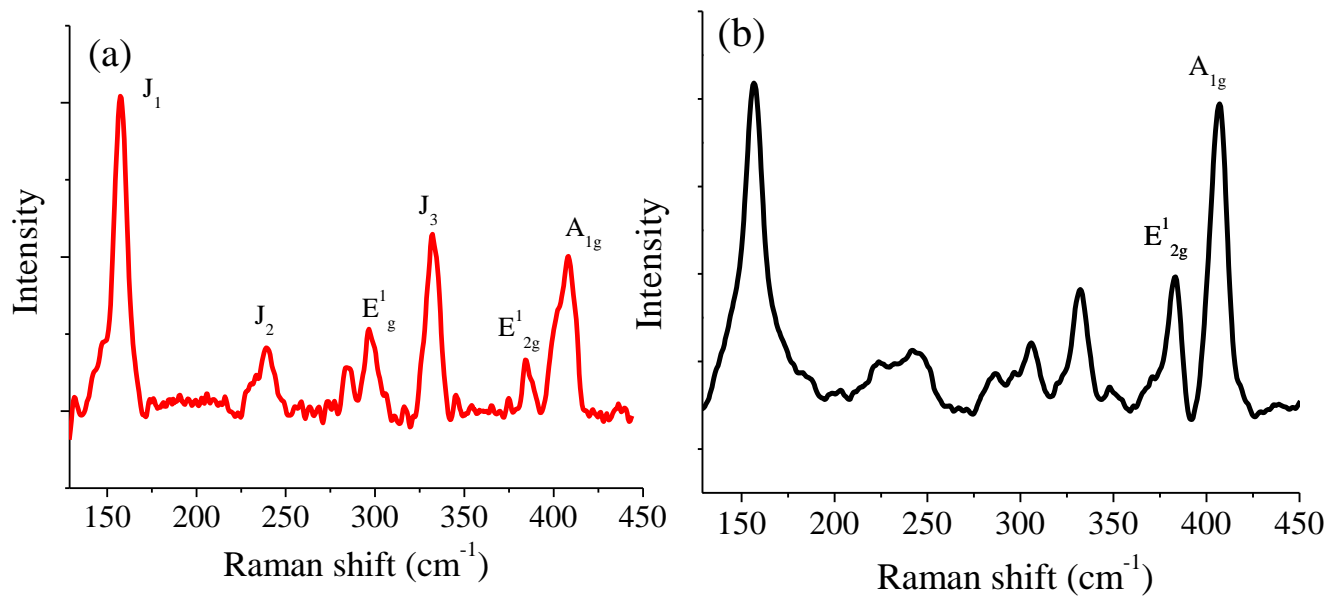

**Fig. S2** Raman spectrum of (a) Exfoliated MoS<sub>2</sub> (red) and (b) Iodobenzene functionalized MoS<sub>2</sub> (black). ( Raman spectrum of exfoliated MoS<sub>2</sub> is recorded in the as obtained liquid state).

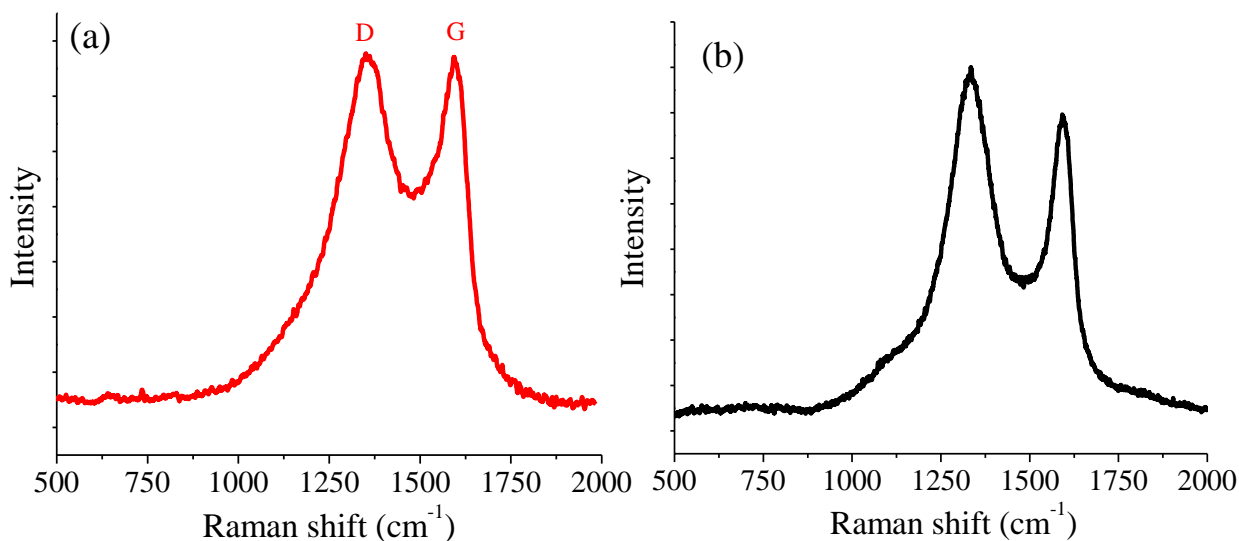

**Fig. S3** Raman spectrum of (a) Reduced graphene oxide (red) and (b) Iodobenzene functionalized RGO (black).

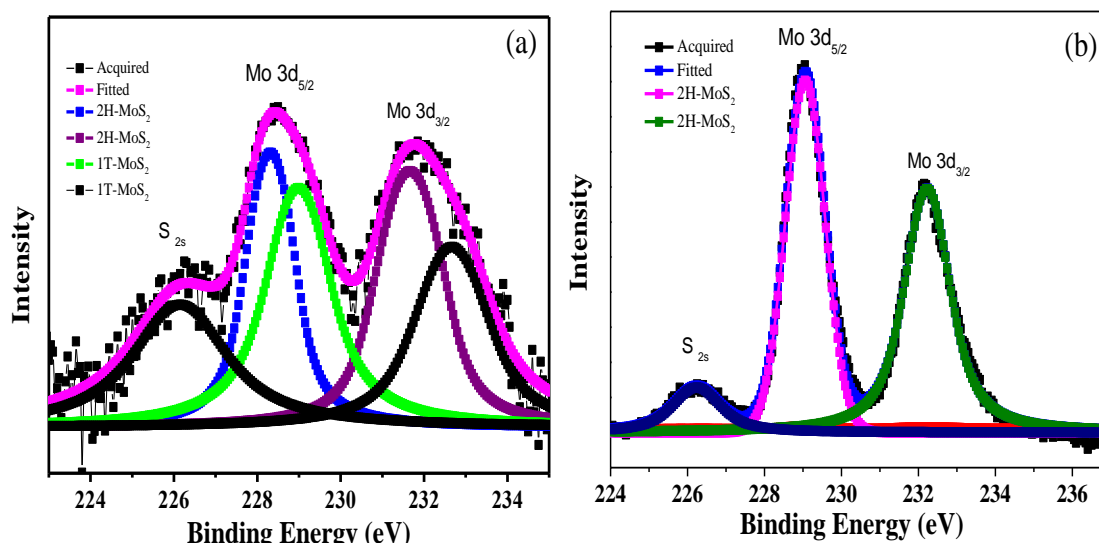

**Fig. S4** Molybdenum (Mo) (3d) X-ray photoelectron spectrum of (a) Iodobenzene functionalized MoS<sub>2</sub> and (b) MoS<sub>2</sub> assemblies. (Mo (3d) peaks are deconvoluted to show 1T and 2H components).

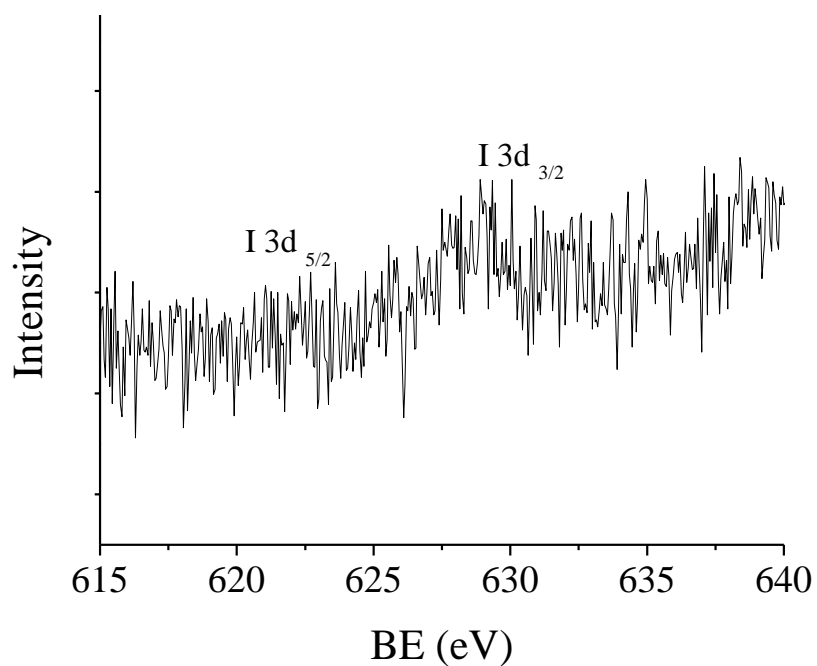

**Fig. S5** Iodine (3d) X-ray photoelectron spectrum of MoS<sub>2</sub> assemblies.

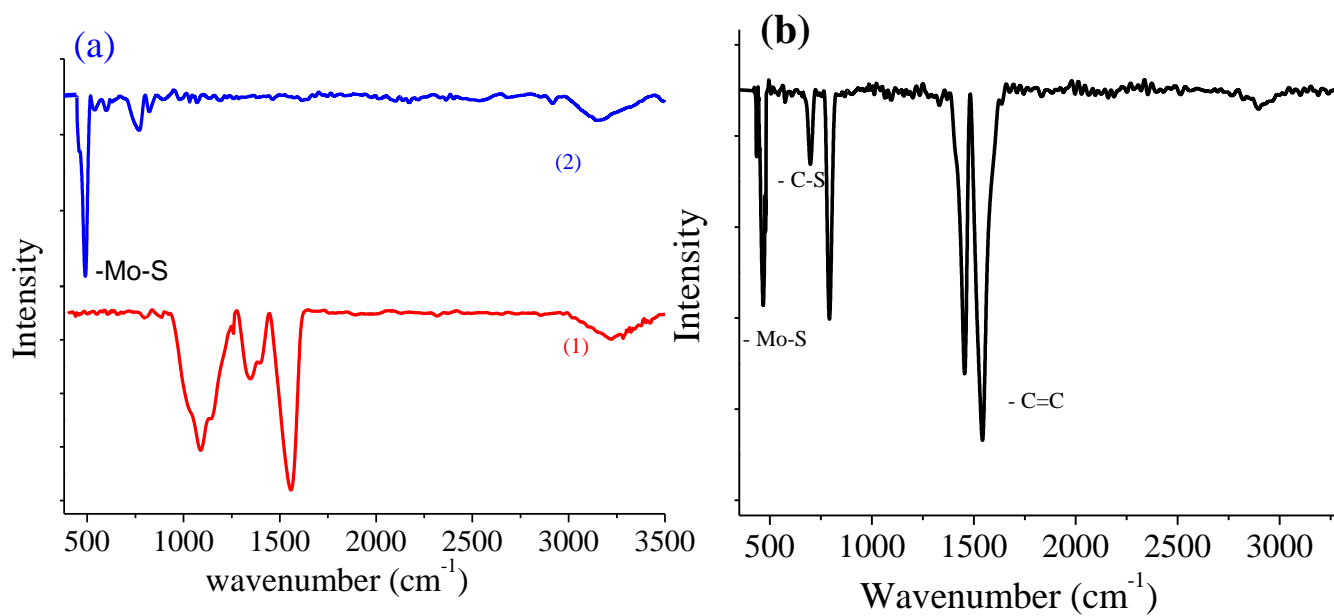

**Fig. S6** (a) ATR-FTIR spectra of Reduced graphene oxide (1, red) and MoS<sub>2</sub> (2, blue); (b) Iodobenzene functionalized MoS<sub>2</sub>.

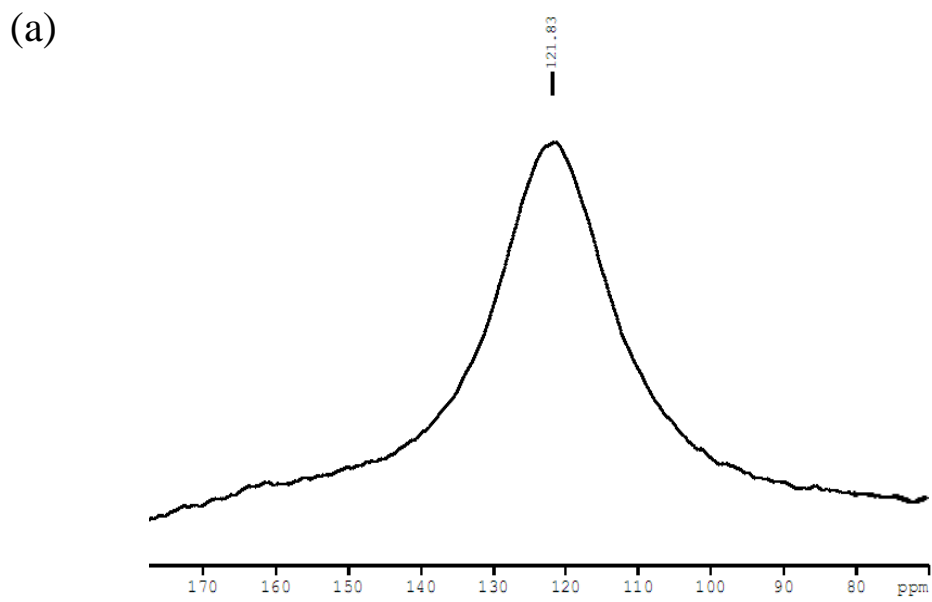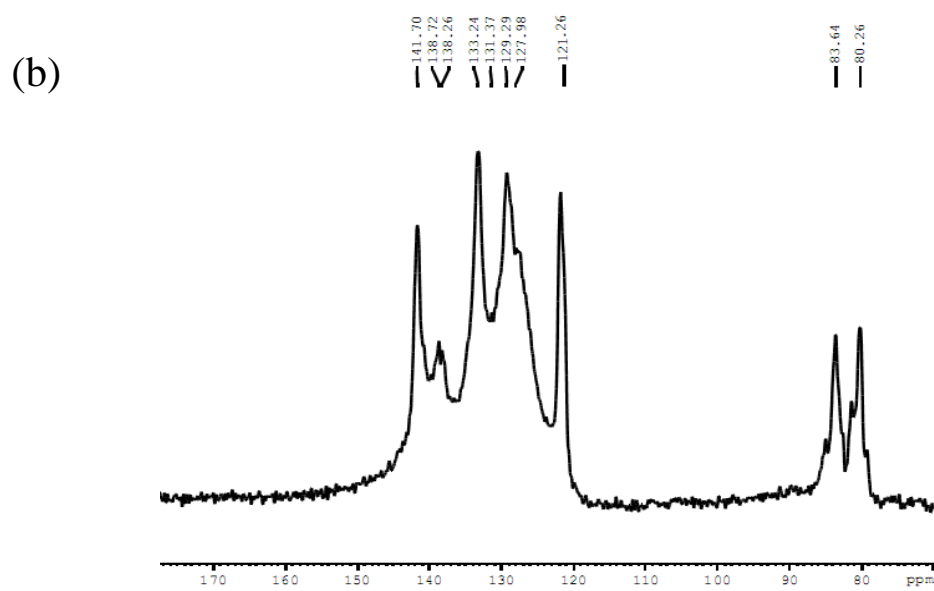

**Fig. S7**  $^{13}\text{C}$  MAS NMR spectrum of (a) RGO and (b) MoS<sub>2</sub>-RGO assemblies at 11 kHz.

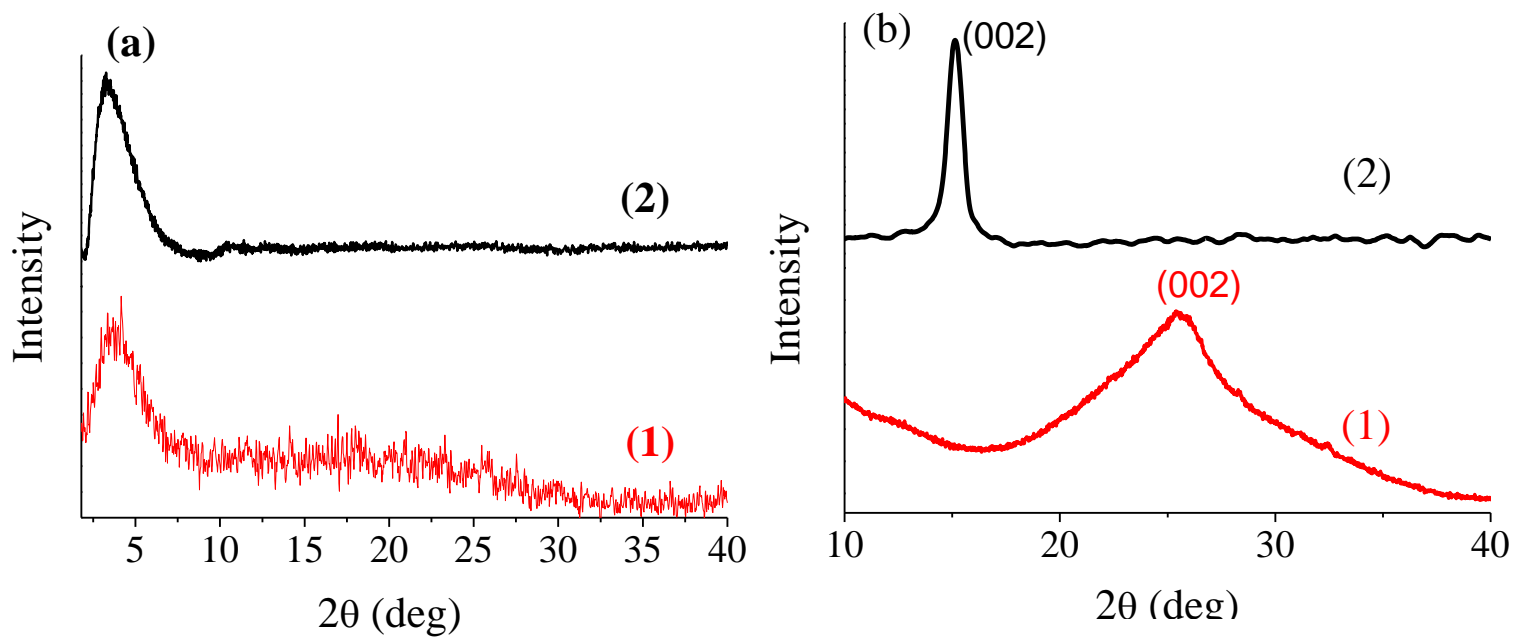

**Fig. S8** XRD pattern of (a) MoS<sub>2</sub>-RGO assemblies (1, red) and MoS<sub>2</sub> assemblies (2, black); (b) RGO-IBz (1, red) and MoS<sub>2</sub>-IBz (2, black).

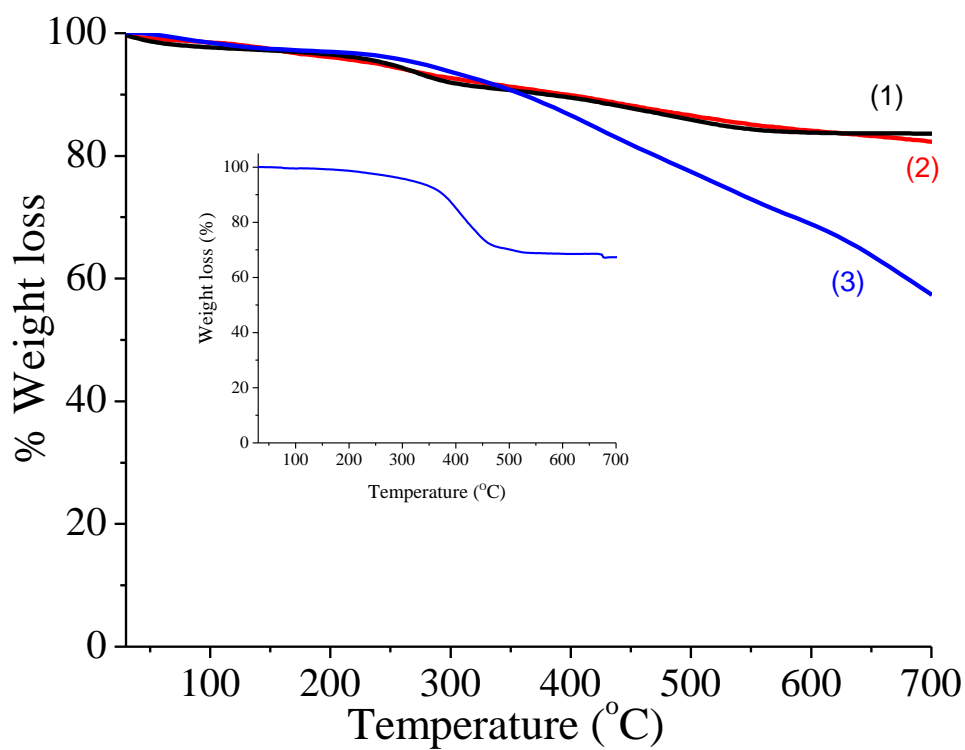

**Fig. S9** TGA profile of MoS<sub>2</sub> assemblies (1, black), (2) MoS<sub>2</sub>-RGO (2, red) assemblies and RGO (3, blue) (inset image shows TGA profile of MoS<sub>2</sub>-IBZ).



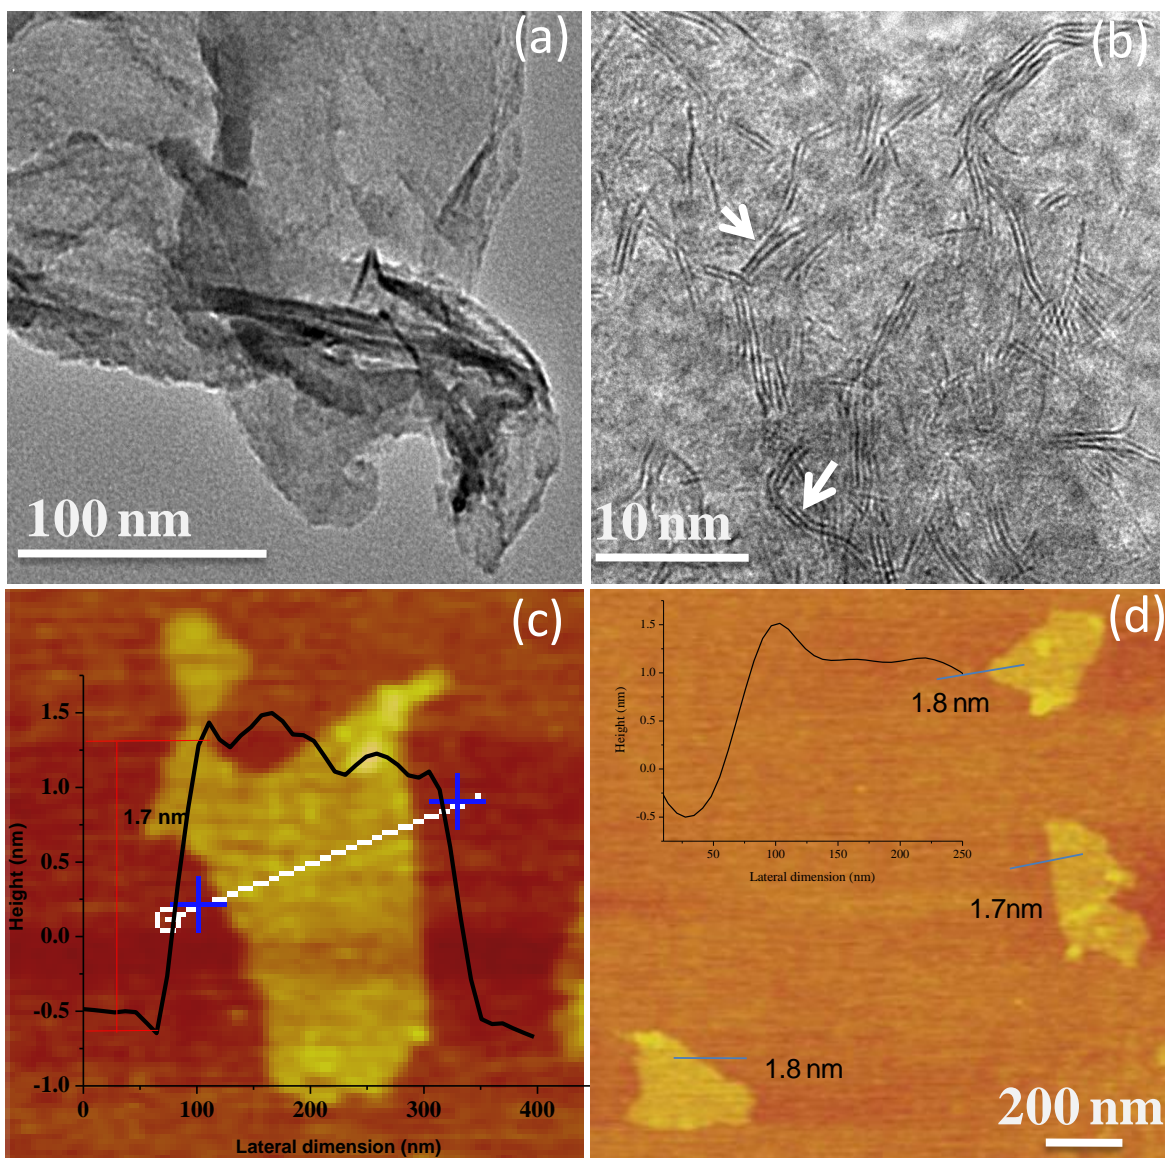

**Fig. S10** (a) TEM, (b) HRTEM (arrows indicates (002) lattice fringes) and (c, d) AFM images of exfoliated MoS<sub>2</sub>.

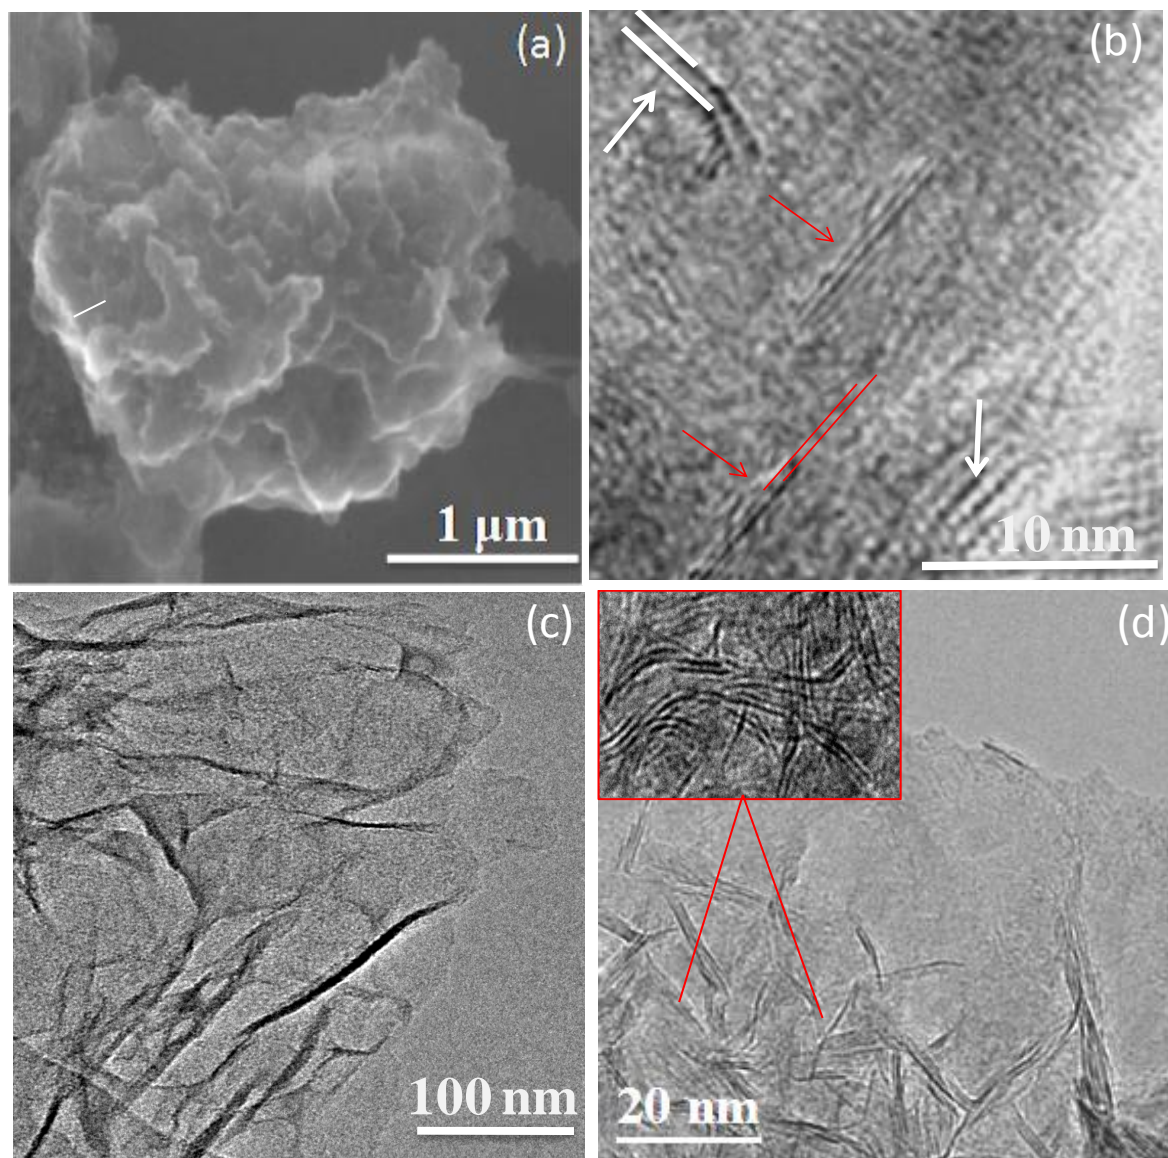

**Fig. S11** (a) FESEM image of MoS<sub>2</sub> assemblies, (b) HRTEM image of MoS<sub>2</sub>-RGO assemblies (white and red arrows indicate MoS<sub>2</sub> and RGO respectively), (c) TEM image of RGO and (d) HRTEM image of MoS<sub>2</sub>/RGO physical mixture (Inset shows magnified portion).

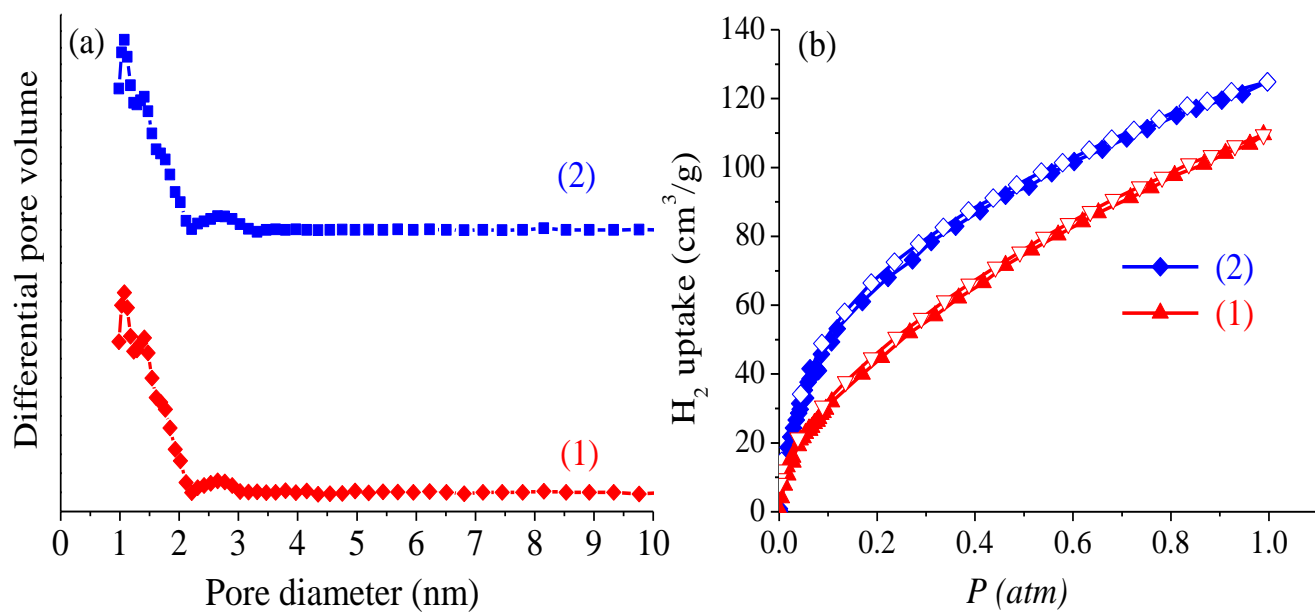

**Fig. S12** (a) Pore size distribution curve, (b) Hydrogen sorption profile at 77 K of MoS<sub>2</sub> assemblies (1, red) and MoS<sub>2</sub>-RGO assemblies (2, blue).

| <b>Serial.<br/>No</b> | <b>Composite</b>                   | <b>Activity<br/>(mmol h<sup>-1</sup> g<sup>-1</sup>)</b> | <b>TOF<br/>(h<sup>-1</sup>)</b> | <b>References</b> |
|-----------------------|------------------------------------|----------------------------------------------------------|---------------------------------|-------------------|
| 1                     | Few-layer MoS <sub>2</sub>         | 0.07                                                     | 0.01                            | Present Work      |
| 2                     | MoS <sub>2</sub> assemblies        | 1.75                                                     | 0.84                            | Present Work      |
| 3                     | MoS <sub>2</sub> -RGO (3:1)        | 1.38                                                     | 0.98                            | Present Work      |
| 4                     | MoS <sub>2</sub> -RGO (2:1)        | 1.30                                                     | 0.94                            | Present Work      |
| 5                     | MoS <sub>2</sub> -RGO (1:1)        | 0.35                                                     | 0.40                            | Present Work      |
| 6                     | MoS <sub>2</sub> -RGO<br>Composite | 3                                                        | 0.68                            | Ref (8)           |
| 7                     | MoS <sub>2</sub> -EG<br>Composite  | 0.54                                                     | 0.21                            | Ref (8)           |

**Table 1:** Comparison of activity of catalyst in terms of yield of H<sub>2</sub> evolved.

(a) TOF calculated per mole of catalytically active material (Graphene considered as catalytically inactive)

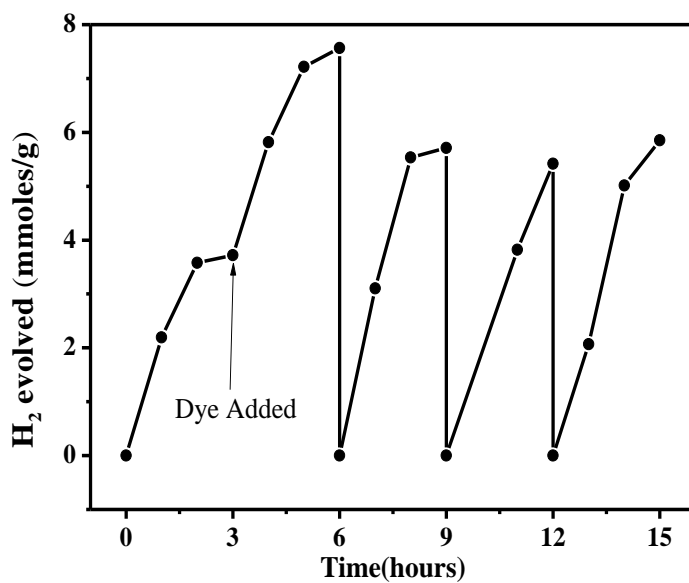

**Fig. S13** Cycling studies of MoS<sub>2</sub> assemblies.

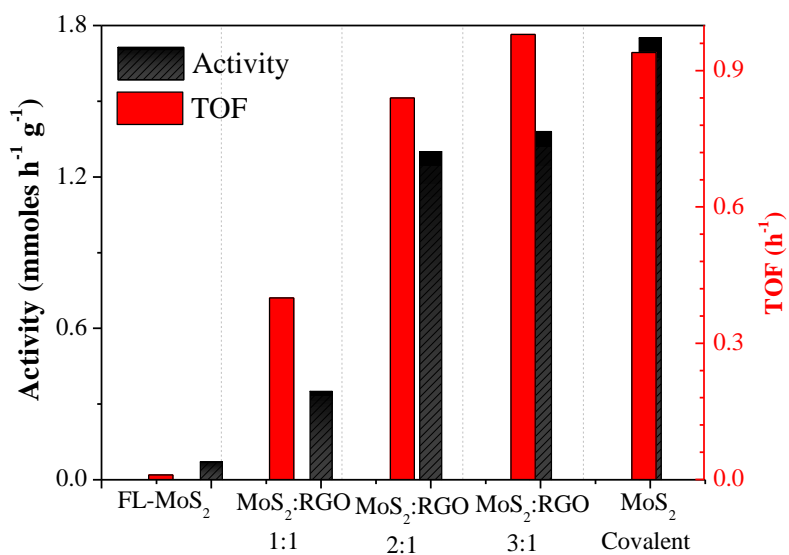

**Fig. S14** Comparison of yield of H<sub>2</sub> (mmoles h<sup>-1</sup> g<sup>-1</sup>) evolved and TOF (h<sup>-1</sup>) by MoS<sub>2</sub> assemblies and different ratio of MoS<sub>2</sub>-RGO assemblies.

References:

1. Q. Li, A. V. Rukavishnikov, P. A. Petukhov, T. O. Zaikova, C. S. Jin, J. F. W. Keana, *J. Org. Chem.*, 2003, **68**, 4862; (b) A. Mangalum, R. J. Jr. Gilliard, J. M. Hanley, A. M. Parker, R. C. Smith, *Org. Biomol. Chem.*, 2010, **8**, 5620.
